# Supplementary material
Source: publisher site journal article supplement (https://www.spandidos-publications.com/7737/downloadSupplementary)
Supplement: Supplementary file 1 [file downloadSupplementary]

Table SI. Primer sequences used for the reverse transcription-quantitative PCR assay.

| Gene     | Forward sequence (5'-3')  | Reverse sequence (5'-3') |
|----------|---------------------------|--------------------------|
| TWIST1   | ACTTCCTCTACCAGGTCCTCCAG   | CCTCCATCCTCCAGACCGAGAA   |
| SNAI2    | TGCCTGTCATACCACAACCAGA    | GGAGGAGGTGTCAGATGGAGGA   |
| ZEB1     | ACCTGCCAACAGACCAGACAGT    | ACATCCTGCTTCATCTGCCTGAG  |
| FN1      | CCGCCGAATGTAGGACAAGA      | TGCCAACAGGATGACATGAAA    |
| VIMENTIN | TGAACCTGAGGGAAACTAA       | TCAAGGTCATCGTGATGCTG     |
| CDH1     | TCCCTTCACAGCAGAACTAACA    | TCACCCACCTCTAAGGCCATC    |
| SNAIL    | ACCACTATGCCGCGCTCTT       | GGTCGTAGGGCTGCTGGAA      |
| ERN1     | GGCGAACAGAATACACCATCACC   | ACGTCCCAGATTCAGTGTCCAC   |
| EIF2AK3  | TGTCATCCAGCCTTAGCAAACCAG  | TCCATGCTTTCACGGTCTTGGTG  |
| XBP1     | CAGCTCAGACTGCCAGAGATCGAA  | TCCGCCTCCTCTTCAGCAACCA   |
| TWIST2   | CTCCAGCTCGCCCGTGTCCCC     | GCTGCCCTTCTTGCCGCGCTT    |
| ATF4     | GGTTCTCCAGCGACAAGG        | TCTCCAACATCCAATCTGTCC    |
| ATF6     | AACTTTCCGTGACTAAACCTGT    | CCTTTAATCTCGCCTCTAACCC   |
| CXCL8    | GTCAGTGCATAAAGACATACTCAA  | CAATAATTTCTGTGTTGGCGCAGT |
| CXCR1    | TTTCTCCATAGCTGCCTCAACCC   | CGATGACGTGCCAAGAACTCC    |
| CXCR2    | CCTGTCTTACTTTTCCGAAGGAC   | TTGCTGTATTGTTGCCCATGT    |
| ZEB2     | CCTACTAATTCAGCCATTACCCAGT | CCACTAAACCCGTGTGTAGCCAT  |
| CDH2     | ACTGCACAGATGTGGACAGG      | GTTCTTTATCCCGGCGTTTC     |
| GAPDH    | GAAGGTGAAGGTCGGAGTC       | GAAGATGGTGATGGGATTTTC    |

Table SII. siRNAs targeting ERN1, PERK, ATF6 and CXCR1.

| Name                 | Sequence (5'-3')            |
|----------------------|-----------------------------|
| Si-ERN1-Sense        | CCUUUCUCCCAGAUCCUAATT       |
| Si-ERN1-Antisense    | UUAGGAUCUGGGAGAAAGGTT       |
| Si-ATF6-Sense        | GUGAGCUACAAGUGUAUUATT       |
| Si-ATF6-Antisense    | UAAUACACUUGUAGCUCACTT       |
| Si-PERK-Sense        | GUAGCUGGAAUGACAUAUAATT      |
| Si-PERK-Antisense    | UUUAUGUCAUCCAGCUCACTT       |
| si-CXCR1-Sense       | UCGUGCCGCUGUUUGUCAUGCUGUUTT |
| si-CXCR1-Antisense   | AACAGCAUGACAAACAGCGGCACGATT |
| Si-Control-Sense     | UUCUCCGAACGUGUCACGUTT       |
| Si-Control-Antisense | ACGUGACACGUUCGGAGAATT       |

siRNA, small interfering RNA; ERN1, endoplasmic reticulum to nucleus signaling 1; PERK, protein kinase R (PKR)-like endoplasmic reticulum kinase; ATF6, activating transcription factor 6; CXCR1, chemokine receptor 1.

Table SIII. Primer sequences used for overexpression plasmid.

| Name | Forward sequence (5'-3') | Reverse sequence (5'-3') |
|------|--------------------------|--------------------------|
| ATF4 | ATGACCGAAATGAGCTTCCTG    | CTAGGGGACCTTTTCTTCC      |

Table SIV. Antibodies used for WB analysis and IHC analyses.

| Antibody                 | Source | Company                                               | Cat. no. | Dilution              |
|--------------------------|--------|-------------------------------------------------------|----------|-----------------------|
| XBP1s                    | Mouse  | BioLegend, Inc.                                       | 647501   | WB 1:1,000            |
| ATF4                     | Rabbit | Chengdu Zen-Bioscience Co., Ltd.                      | R381426  | WB 1:1,000            |
| ATF6                     | Rabbit | Chengdu Zen-Bioscience Co., Ltd.                      | R26445   | WB 1:1,000            |
| CXCL8 (IL-8)             | Rabbit | Affinity Biosciences                                  | AF5146   | WB 1:1,000,           |
| CXCR1                    | Rabbit | Sangon Biotech Co., Ltd.                              | 260229   | WB 1:1,000; IHC 1:100 |
| CXCR2                    | Rabbit | Sangon Biotech Co., Ltd.                              | 260228   | WB 1:1,000; IHC 1:100 |
| ZEB1                     | Rabbit | Chengdu Zen-Bioscience Co., Ltd.                      | R382171  | WB 1:1,000; IHC 1:100 |
| SNAI2 (SLUG)             | Rabbit | Chengdu Zen-Bioscience Co., Ltd.                      | 350136   | WB 1:1,000; IHC 1:100 |
| SMAD2                    | Rabbit | Chengdu Zen-Bioscience Co., Ltd.                      | R25742   | WB 1:1,000            |
| SMAD3                    | Rabbit | Chengdu Zen-Bioscience Co., Ltd.                      | R25743   | WB 1:1,000            |
| p-SMAD2                  | Rabbit | Chengdu Zen-Bioscience Co., Ltd.                      | 310079   | WB 1:1,000; IHC 1:100 |
| p-SMAD3                  | Rabbit | Chengdu Zen-Bioscience Co., Ltd.                      | 680679   | WB 1:1,000; IHC 1:100 |
| AKT                      | Rabbit | Chengdu Zen-Bioscience Co., Ltd.                      | R23412   | WB 1:1,000            |
| p-AKT                    | Rabbit | Chengdu Zen-Bioscience Co., Ltd.                      | 310021   | WB 1:1,000            |
| STAT3                    | Rabbit | Chengdu Zen-Bioscience Co., Ltd.                      | R22785   | WB 1:1,000            |
| p-STAT3                  | Rabbit | Chengdu Zen-Bioscience Co., Ltd.                      | 381552   | WB 1:1,000            |
| $\beta$ -catenin         | Rabbit | Abimat Pharmaceutical Technology (Shanghai) Co., Ltd. | PK02151  | WB 1:1,000            |
| ERN1                     | Mouse  | Chengdu Zen-Bioscience Co., Ltd.                      | 220399   | WB 1:1,000            |
| EIF2AK3                  | Rabbit | Chengdu Zen-Bioscience Co., Ltd.                      | R25331   | WB 1:1,000            |
| Goat anti-rabbit IgG HRP | Goat   | Chengdu Zen-Bioscience Co., Ltd.                      | 511203   | WB 1:5,000; IHC 1:200 |
| Goat anti-mouse IgG HRP  | Goat   | Chengdu Zen-Bioscience Co., Ltd.                      | 511103   | WB 1:5,000            |

WB, western blot; IHC, immunohistochemical; p-, phosphorylated, XBP1, X-box binding protein 1; ATF, activating transcription factor; CXCL, C-X-C motif chemokine ligand; CXCR, chemokine receptor; ERN, endoplasmic reticulum to nucleus signaling; EIF2AK3, as eukaryotic translation initiation factor 2 alpha kinase 3.

Table SV. Primer sequences used for dual-luciferase reporter plasmids.

| Name                  | Forward sequence (5'-3')  | Reverse sequence (5'-3') |
|-----------------------|---------------------------|--------------------------|
| CXCL8 (-112bp/+28bp)  | GGGCCATCAGTTGCAAATCGT     | GGGCCATCAGTTGCAAATCGT    |
| CXCL8 (-22bp/+206bp)  | CACCGGAGCACTCCATAAGGC     | TTTGGAGTATGTCTTTATGCACT  |
| CXCL8 (-181bp/+48bp)  | TAATCACCAAATGTGGAGCTT     | TTCTTCCTGGCTCTTGCCTA     |
| CXCL8 (-100bp/+48bp)  | AAATCGTGGAATTCCTCTGACA    | GTTTCTTCCTGGCTCTTGCC     |
| ZEB1 (-813bp/+47bp)   | TGTGGGTATTACTATTCCGCTCT   | GCCTGCTTTCTGCGCTTACAC    |
| SNAI2 (-795bp/+101bp) | CGGTGGTTCCAAATGACAGTTACCT | CACGGCGGTCCCTACAGCATC    |
| SNAI2 (-364bp/+101bp) | CCCTTCCTTCTCCTGGCGGACA    | CACGGCGGTCCCTACAGCATC    |

CXCL, C-X-C motif chemokine ligand.
